# Supplementary material for: Neutrophil-to-lymphocyte ratio: a potential supportive marker for elderly community-acquired bloodstream infections—a retrospective study
Source: PeerJ. 2025 Dec 8;13:e20449. doi: 10.7717/peerj.20449 (PMC12697295; doi:10.7717/peerj.20449)
Supplement: Supplemental Information 3 [file peerj-13-20449-s003.xlsx]

## Sheet: Sheet1
	0	1	2	3	4	5
Group	Not BSI	BSI
Sex	Female	Male
BSI Clinical Manifestations（row5-38)	without this clinical feature	with this clinical feature
Comorbidity(row 39-43)	without this Comorbidity	with this Comorbidity
Other infection names(row 44-48)	without infection in this region	with infection in this region
Other site infections(row 49)	without infection	with infection
different pathogens(row61-65)	infection without this pathogen	infection with this pathogen
Sepsis/Severe/Septic Shock(row 67)		sepsis	severe sepsis	septic shock
MODS(row 68)	without MODS	with MODS
Prognosis(row 70)	/	Medical discharge	Medical transfer	/	Discharge against medical advice	Death
Secondary BSI Site(row 78)		Respiratory system	Urinary system	Uncertain
Primary/Secondary(row 79)	Primary	Secondary	Unknown
row 84-85		Lymphocyte count＜0.9	Lymphocyte count≥0.9
